# Supplementary material
Source: PubMed Central journal article supplement (PMC3836607)
Supplement: NIHMS525145-supplement-1.pdf [file NIHMS525145-supplement-1.pdf]

## Supplemental Materials

### **Genetic Variation in the Inflammation and Innate Immunity Pathways and Colorectal Cancer Risk**

Hansong Wang, Darin Taverna, Daniel O. Stram, Barbara K. Fortini, Iona Cheng, Lynne R. Wilkens, Terrilea Burnett, Karen W. Makar, Noralane M. Lindor, John L. Hopper, Steve Gallinger, John A. Baron, Robert Haile, Laurence N. Kolonel, Brian E. Henderson, Polly A. Newcomb, Graham Casey, David Duggan, Cornelia M. Ulrich, Loïc Le Marchand

**Correspondence:** Loïc Le Marchand, Epidemiology Program, University of Hawaii Cancer Center, 701 Ilalo Street, Honolulu, HI 96813; email: [loic@cc.hawaii.edu](mailto:loic@cc.hawaii.edu) ; Tel: (808) 586-2988; Fax: (808) 586-2982.

### **Quality control (QC) for Stage 1 genotypes**

A total of 724 SNPs were successfully genotyped for 7,086 subjects (82% whites) at the Translational Genomics Research Institute (TGen, Phoenix, AZ) using Illumina GoldenGate bead-based genotyping technology. Duplicate samples of study subjects (2%) and 90 HapMap CEU (European) subjects were also genotyped for QC purposes. Mean concordance rates were 99.8% (all  $\geq 97\%$ ) for both intra- and inter-plate replicates. 50 SNPs with concordance rates  $< 99\%$  were manually reviewed and one was removed due to poor clustering. SNPs were then excluded ( $n=107$ ) based on the following criteria: 1) call rate  $< 95\%$ ; 2)  $> 1$  Mendelian error among the 22 HapMap CEU trios; 3) p-value from Hardy-Weinberg Equilibrium (HWE) test among unrelated CEU subjects  $< 0.001$ ; or 4)  $\leq 2$  counts of minor alleles. Subjects were removed if call rates were  $< 90\%$ , key covariates (age, gender, race or parents) were missing, or if no discordant sib pair was available after previous filtering. In the end, 6,450 subjects on 616 SNPs were retained for analysis.

### **Risk factors considered in Stage 1 in CCFR**

The following colorectal cancer risk factors did not substantially change the ORs and were not included as covariates in the final model: pack-years of smoking (0,  $\leq 20$ ,  $> 20$ ), aspirin intake (ever/never taken aspirin regularly, i.e.  $\geq$  twice per week for more than a month), BMI (2 years before interview), education, whether subjects participated in rigorous physical activity in the nearest age decade, history of irritable bowel syndrome, diabetes, and Crohn's disease, and hormone replacement therapy (men were assigned zero).

### **Quality control (QC) for Stage 2 genotypes**

We excluded 13 SNPs based on the following criteria: 1) call rates  $< 95\%$ ; 2) any Mendelian errors in HapMap trios; 3) concordance rates among replicates  $< 99\%$  and of poor clustering quality; 4) p-value from HWE test  $< 0.0001$  in European American controls and of poor clustering quality; or 5) MAF  $< 0.005$  in MEC data. The average concordance rate was 99.5% among replicate pairs and 99.6% among 56 HapMap subjects for the 333 overlapping SNPs genotyped both here and in the HapMap database. Subjects were excluded ( $n=151$ ) if call rates were  $< 90\%$  or if the principal components (PCs) based on 93 ancestry informative markers indicated inconsistencies with their self-reported ethnicity (ancestry informative markers and therefore PCs were not available for 144 subjects).

## SNP-set enrichment analysis in Stage 1 (in CCFR data)

For SNP-set based analyses, SNPs were associated with the closest gene based on distance (within  $\leq 25\text{kb}$  on both sides, as shown in Table 1). Genes within 25kb of each other were grouped into one region. We restricted analysis to the 28 gene regions (400 SNPs) that contained  $\geq 5$  SNPs with minor allele frequency 0.01 or higher. The 28 gene regions were: *IL15*, *TLR1/TLR6*, *TLR2*, *TLR4*, *TLR5*, *TIRAP*, *TLR7/TLR8*, *CRP*, *IL1A*, *IL1B*, *IL1RN*, *IL6*, *IL10*, *ILR23*, *LTA /TNF*, *PPARG*, *NOD1(CARD4)*, *NOD2(CARD15)*, *ALOX5*, *ALOX12*, *PGDH*, *PGIS*, *TBXAS 1*, *PTGES*, and PGE2 receptors *EP1 - EP4*. The number of variants was from 5 to 48 per gene region.

To test whether any gene is over-represented among the top associated SNPs – an indicator of the collective effect of all SNPs in that gene, a Kolmogorov-Smirnov-like running sum based on the ranked single-variant  $\chi^2$  statistics, as proposed before [Wang, et al. 2007].

Let  $r_{(j)}$  be the decreasingly ordered  $\chi^2$  association statistics of SNP  $j$  and  $G_j$  be the gene that SNP  $j$  is mapped to. For each gene  $S$  that contains multiple SNPs, a weighted Kolmogorov-Smirnov-like running sum score  $SG$  was calculated as,

$$SG = \max_{1 \leq j \leq N} \left\{ \sum_{j^* \leq j, G_{j^*} \in S} \frac{r_{(j^*)}}{\sum_{G_{j^*} \in S} r_{(j^*)}} - \sum_{j^* \leq j, G_{j^*} \notin S} \frac{1}{N - N_S} \right\}$$

where  $N$  is the number of total SNPs and  $N_S$  is the number of SNPs for gene  $S$ .

To get a p-value for a gene  $S$ , case-control status was permuted 2500 times within each sibship. Larger genes tend to result in larger scores (by chance). To make the scores comparable across genes, we calculated a normalized observed score

$$ZG = \frac{SG - \text{mean}(SG(\pi))}{SE(SG(\pi))}$$

where *mean* and *SE* were from all "permuted" scores for the same gene, denoted by  $SG(\pi)$ . The P-value for the observed score was the fraction among all permutations where the *permuted* scores were greater than the observed.

## Reference

Wang K, Li M, Bucan M. 2007. Pathway-Based Approaches for Analysis of Genomewide Association Studies. *Am J Hum Genet* 81(6):1278-1283.

**Supplementary Table 1.** Genes in the inflammation and innate immunity pathways this study

| Gene Symbol      | Gene Name                                                                                         | CHR | Number of genotyped | Number of analyzed |
|------------------|---------------------------------------------------------------------------------------------------|-----|---------------------|--------------------|
| <i>CRP</i>       | C-reactive protein                                                                                | 1   | 7                   | 5                  |
| <i>IL10</i>      | Interleukin 10                                                                                    | 1   | 8                   | 8                  |
| <i>PHGDH</i>     | phosphoglycerate dehydrogenase                                                                    | 1   | 22                  | 14                 |
| <i>PTGER3</i>    | prostaglandin E receptor 3 (subtype EP3)                                                          | 1   | 44                  | 36                 |
| <i>TLR5</i>      | Toll-like receptor 5                                                                              | 1   | 22                  | 17                 |
| <i>IL1A</i>      | Interleukin 1-alpha                                                                               | 2   | 9                   | 6                  |
| <i>IL1B</i>      | Interleukin 1-beta                                                                                | 2   | 7                   | 6                  |
| <i>IL1RN</i>     | Interleukin 1 receptor antagonist                                                                 | 2   | 12                  | 11                 |
| <i>IL12A</i>     | Interleukin-12A                                                                                   | 3   | 7                   | 2                  |
| <i>PPARG</i>     | peroxisome proliferative activated receptor, gamma                                                | 3   | 68                  | 60                 |
| <i>TLR9</i>      | Toll-like receptor 9                                                                              | 3   | 15                  | 8                  |
| <i>IL15</i>      | Interleukin 15                                                                                    | 4   | 12                  | 11                 |
| <i>IL8</i>       | Interleukin 8                                                                                     | 4   | 1                   | 1                  |
| <i>TLR1/TLR6</i> | Toll-like receptor 1 and 6                                                                        | 4   | 26                  | 19                 |
| <i>TLR2</i>      | Toll-like receptor 2                                                                              | 4   | 21                  | 14                 |
| <i>TLR3</i>      | Toll-like receptor 3                                                                              | 4   | 13                  | 10                 |
| <i>PTGER4</i>    | prostaglandin E receptor 4 (subtype EP4)                                                          | 5   | 9                   | 6                  |
| <i>LTA/TNF</i>   | lymphotoxin alpha (TNF superfamily, member 1) & Tumor necrosis factor (TNF superfamily, member 2) | 6   | 19                  | 15                 |
| <i>CARD4</i>     | caspase recruitment domain family, member 4                                                       | 7   | 21                  | 18                 |
| <i>IL6</i>       | Interleukin 6 (interferon, beta 2)                                                                | 7   | 8                   | 7                  |
| <i>TBXAS1</i>    | thromboxane A synthase 1                                                                          | 7   | 75                  | 65                 |
| <i>PTGES</i>     | prostaglandin E synthase                                                                          | 9   | 11                  | 9                  |
| <i>TLR4</i>      | Toll-like receptor 4                                                                              | 9   | 28                  | 22                 |
| <i>ALOX5</i>     | arachidonate 5-lipoxygenase                                                                       | 10  | 31                  | 21                 |
| <i>TIRAP</i>     | Toll-interleukin 1 receptor (TIR) domain containing adaptor protein                               | 11  | 18                  | 15                 |
| <i>IL23A</i>     | Interleukin 23, alpha subunit p19                                                                 | 12  | 10                  | 7                  |
| <i>KLRK1</i>     | killer cell lectin-like receptor subfamily K, member 1                                            | 12  | 12                  | 10                 |
| <i>PTGER2</i>    | prostaglandin E receptor 2 (subtype EP2), 53kDa                                                   | 14  | 10                  | 10                 |
| <i>CARD15</i>    | caspase recruitment domain family, member 15                                                      | 16  | 21                  | 17                 |
| <i>ALOX12</i>    | arachidonate 12-lipoxygenase                                                                      | 17  | 11                  | 9                  |
| <i>GDF15</i>     | Growth differentiation factor 15                                                                  | 19  | 7                   | 3                  |
| <i>PTGER1</i>    | prostaglandin E receptor 1 (subtype EP1), 42kDa                                                   | 19  | 16                  | 15                 |
| <i>PTGIS</i>     | prostaglandin I2 (prostacyclin) synthase                                                          | 20  | 48                  | 31                 |
| <i>TLR7/TLR8</i> | Toll-like receptor 7 and 8                                                                        | 23  | 36                  | 29                 |
| <b>Total</b>     |                                                                                                   | 34  | 685                 | 537                |

**Supplementary Table 2. GxE interaction effects in CCFR analysis that were promoted to Stage 2, all with pack-years of smoking (0, ≤20, >20) ( $P_{\text{interaction}} < 0.001$ ).**

| rs ID    | Chr | Position (HG18) | Gene  | Minor | Major | $P_{\text{interaction}}$ |
|----------|-----|-----------------|-------|-------|-------|--------------------------|
| 12487012 | 3   | 12331196        | PPARG | G     | A     | 0.0007                   |
| 4684101  | 3   | 12336295        | PPARG | G     | A     | 0.0006                   |
| 560976   | 20  | 47604010        | PTGIS | A     | G     | $5 \times 10^{-5}$       |
| 4147584  | 9   | 131542720       | PTGES | G     | C     | 0.0004                   |
| 4837403  | 9   | 131545447       | PTGES | A     | G     | 0.0004                   |

Analysis was adjusted for age and gender based on 2,322 discordant sibships. Sample size may vary due to sporadic missing genotypes. All SNPs were genotyped.

**Supplementary Table 3. Important main effects <sup>a</sup> in CCFR analysis**

| CHR | BP (GRCh37) | SNP           | Minor (Tested) | Major | OR (95% CI)        | P                 | Type      | Gene <sup>b</sup> |        |
|-----|-------------|---------------|----------------|-------|--------------------|-------------------|-----------|-------------------|--------|
| 1   | 71328234    | rs7533733     | G              | A     | 0.91 (0.82, 1.01)  | 0.09              | Genotyped | PTGER3            |        |
|     | 71334273    | rs1409985     | A              | T     | 1.11 (1.00, 1.23)  | 0.05              | Imputed   | PTGER3            |        |
|     | 120256713   | rs636101      | G              | A     | 1.10 (0.98, 1.23)  | 0.10              | Genotyped | PHGDH             |        |
|     | 120262112   | rs41276626    | A              | G     | 0.80 (0.69, 0.93)  | 0.004             | Imputed   | PHGDH             |        |
|     | 120262848   | rs12139860    | G              | T     | 1.25 (1.07, 1.44)  | 0.004             | Imputed   | PHGDH             |        |
|     | 120267431   | rs55899400    | A              | G     | 0.81 (0.70, 0.93)  | 0.004             | Imputed   | PHGDH             |        |
|     | 120271077   | rs6668589     | C              | T     | 0.89 (0.80, 1.00)  | 0.05              | Imputed   | PHGDH             |        |
|     | 120272726   | rs3828090     | A              | G     | 0.89 (0.80, 1.00)  | 0.05              | Imputed   | PHGDH             |        |
|     | 120273204   | rs11589332    | G              | A     | 0.89 (0.80, 1.00)  | 0.04              | Genotyped | PHGDH             |        |
|     | 120274455   | rs2246410     | A              | G     | 0.88 (0.79, 0.99)  | 0.03              | Genotyped | PHGDH             |        |
|     | 206944233   | rs1554286     | A              | G     | 1.15 (1.01, 1.31)  | 0.03              | Genotyped | IL10              |        |
|     | 206944645   | rs1518111     | A              | G     | 1.15 (1.02, 1.3)   | 0.02              | Genotyped | IL10              |        |
|     | 206944861   | rs1518110     | A              | C     | 1.16 (1.03, 1.31)  | 0.02              | Imputed   | IL10              |        |
|     | 206946407   | rs1800872     | A              | C     | 1.18 (1.04, 1.32)  | 0.007             | Genotyped | IL10              |        |
|     | 206946634   | rs1800871     | A              | G     | 1.18 (1.05, 1.32)  | 0.007             | Genotyped | IL10              |        |
| 2   | 113885269   | rs55860727    | A              | G     | 11.0 (2.57, 47.3)  | 0.001             | Genotyped | IL1RN             |        |
|     | 241530750   | rs2975758     | G              | A     | 1.14 (0.99, 1.30)  | 0.07              | Genotyped | CAPN10            |        |
| 3   | 12340925    | rs17036188    | C              | T     | 0.73 (0.55, 0.97)  | 0.03              | Imputed   | PPARG             |        |
|     | 12376427    | chr3_12376427 | A              | G     | 1.38 (1.04, 1.82)  | 0.02              | Imputed   | PPARG             |        |
|     | 12463176    | rs709158      | A              | G     | 1.12 (1.01, 1.25)  | 0.03              | Imputed   | PPARG             |        |
|     | 12465243    | rs1175540     | A              | C     | 0.89 (0.80, 1.00)  | 0.04              | Imputed   | PPARG             |        |
|     | 12465488    | rs1175541     | A              | C     | 0.90 (0.80, 1.00)  | 0.04              | Imputed   | PPARG             |        |
|     | 12466433    | rs1175543     | A              | G     | 1.12 (1.01, 1.25)  | 0.04              | Imputed   | PPARG             |        |
|     | 12466490    | rs1177809     | A              | G     | 1.13 (1.01, 1.26)  | 0.03              | Imputed   | PPARG             |        |
|     | 12470239    | rs1797912     | C              | A     | 0.91 (0.82, 1.01)  | 0.07              | Genotyped | PPARG             |        |
|     | 12475994    | rs4135300     | A              | G     | 0.85 (0.70, 1.02)  | 0.08              | Genotyped | PPARG             |        |
|     | 52247110    | rs352163      | A              | G     | 0.88 (0.79, 0.98)  | 0.02              | Imputed   | ALAS1             |        |
|     | 52247314    | rs164640      | C              | T     | 1.14 (1.02, 1.26)  | 0.02              | Imputed   | ALAS1             |        |
|     | 52252969    | rs352162      | A              | G     | 1.13 (1.02, 1.25)  | 0.02              | Genotyped | TLR9              |        |
|     | 52256697    | rs352140      | C              | T     | 1.14 (1.02, 1.26)  | 0.02              | Imputed   | TLR9              |        |
|     | 52258372    | rs352139      | C              | T     | 0.88 (0.79, 0.98)  | 0.02              | Imputed   | TLR9              |        |
|     | 52261031    | rs187084      | G              | A     | 0.91 (0.82, 1.01)  | 0.07              | Genotyped | TLR9              |        |
|     | 99873317    | rs2130369     | C              | T     | 0.89 (0.80, 0.99)  | 0.03              | Imputed   | CMSS1             |        |
|     | 99880569    | rs720688      | G              | A     | 1.12 (1.01, 1.23)  | 0.04              | Genotyped | CMSS1             |        |
|     | 159713846   | rs640039      | G              | A     | 0.88 (0.76, 1.02)  | 0.10              | Genotyped | IL12A             |        |
|     | 4           | 175429808     | rs3775977      | A     | G                  | 1.15 (1.03, 1.28) | 0.02      | Genotyped         | PGDH   |
|     | 5           | 40681710      | rs34902673     | G     | A                  | 1.95 (0.95, 4.00) | 0.07      | Genotyped         | PTGER4 |
|     |             | 78830778      | rs6859424      | C     | G                  | 0.88 (0.79, 0.98) | 0.02      | Imputed           |        |
|     |             | 78837556      | rs736201       | T     | A                  | 1.12 (1.01, 1.24) | 0.03      | Genotyped         |        |
| 6   | 31543672    | rs3179060     | A              | C     | 9.05 (1.03, 79.29) | 0.05              | Genotyped | LTA/TNF           |        |
|     | 31544591    | rs1800620     | A              | G     | 6.94 (0.76, 63.1)  | 0.09              | Genotyped | LTA/TNF           |        |
| 7   | 22771038    | rs2069860     | T              | A     | 1.56 (0.92, 2.63)  | 0.10              | Genotyped | IL6               |        |
|     | 139542268   | rs6952056     | G              | T     | 1.15 (1.03, 1.28)  | 0.01              | Imputed   | TBXAS1            |        |
|     | 139542515   | rs6974960     | A              | G     | 1.15 (1.03, 1.28)  | 0.010             | Imputed   | TBXAS1            |        |
|     | 139543904   | rs4725857     | C              | T     | 0.87 (0.78, 0.96)  | 0.009             | Imputed   | TBXAS1            |        |
|     | 139544552   | rs7796073     | C              | G     | 0.87 (0.78, 0.97)  | 0.010             | Imputed   | TBXAS1            |        |
|     | 139544674   | rs7810415     | G              | A     | 1.13 (1.02, 1.25)  | 0.02              | Genotyped | TBXAS1            |        |
|     | 139545370   | rs2267682     | G              | T     | 0.88 (0.79, 0.97)  | 0.01              | Imputed   | TBXAS1            |        |
|     | 139565916   | rs17161190    | G              | A     | 0.63 (0.38, 1.03)  | 0.06              | Genotyped | TBXAS1            |        |

|    |           |                |   |   |                   |       |           |              |
|----|-----------|----------------|---|---|-------------------|-------|-----------|--------------|
|    | 139572123 | rs6138         | A | G | 0.15 (0.02, 1.21) | 0.08  | Genotyped | TBXAS1       |
|    | 139654256 | rs4725563      | G | A | 0.90 (0.80, 1.01) | 0.07  | Genotyped | TBXAS1       |
|    | 139669877 | chr7_139669877 | C | G | 0.44 (0.20, 1.00) | 0.05  | Imputed   | TBXAS1       |
|    | 139672739 | rs2267701      | C | G | 0.84 (0.72, 0.96) | 0.01  | Genotyped | TBXAS1       |
|    | 139680969 | rs2299896      | C | T | 1.2 (1.04, 1.39)  | 0.01  | Imputed   | TBXAS1       |
|    | 139681566 | chr7_139681566 | C | T | 2.25 (1.00, 5.05) | 0.05  | Imputed   | TBXAS1       |
|    | 139681614 | chr7_139681614 | C | T | 2.25 (1.00, 5.05) | 0.05  | Imputed   | TBXAS1       |
|    | 139683640 | chr7_139683640 | G | T | 2.25 (1.00, 5.05) | 0.05  | Imputed   | TBXAS1       |
|    | 139684043 | rs10487667     | C | A | 1.13 (1.01, 1.27) | 0.03  | Genotyped | TBXAS1       |
| 9  | 120478936 | rs7873784      | G | C | 0.87 (0.75, 1.00) | 0.05  | Genotyped | TLR4         |
|    | 120485215 | rs2183016      | C | A | 0.86 (0.75, 1.00) | 0.04  | Genotyped | TLR4         |
|    | 120485795 | rs7045953      | G | A | 0.87 (0.75, 1.00) | 0.05  | Genotyped | TLR4         |
|    | 120488996 | rs10759934     | A | T | 0.91 (0.82, 1.01) | 0.07  | Genotyped | TLR4         |
|    | 132496676 | rs12001465     | G | A | 1.12 (0.98, 1.29) | 0.10  | Genotyped | PTGES        |
|    | 132498957 | rs36022765     | A | G | 1.68 (0.92, 3.09) | 0.09  | Genotyped | PTGES        |
| 10 | 45920506  | rs2228065      | A | G | 3.38 (1.00, 11.5) | 0.05  | Genotyped | ALOX5        |
| 11 | 35156500  | rs353560       | C | A | 0.82 (0.66, 1.03) | 0.10  | Genotyped | LOC100507144 |
|    | 126147003 | rs7116126      | G | A | 3.96 (0.89, 17.5) | 0.07  | Genotyped | TIRAP        |
| 16 | 48173381  | rs8046826      | G | A | 0.88 (0.79, 0.99) | 0.03  | Genotyped | ABCC12       |
|    | 50744688  | rs5743271      | G | A | 0.55 (0.30, 1.02) | 0.06  | Genotyped | CARD15       |
|    | 50756540  | rs2066845      | G | C | 0.70 (0.46, 1.07) | 0.10  | Genotyped | CARD15       |
|    | 56980908  | rs173537       | G | A | 1.30 (1.02, 1.66) | 0.03  | Genotyped | HERPUD1      |
| 19 | 14573654  | rs2420538      | G | A | 1.09 (0.98, 1.21) | 0.09  | Genotyped | PTGER1       |
| 20 | 48113300  | rs6095543      | G | A | 1.14 (1.00, 1.31) | 0.05  | Genotyped | PTGIS        |
|    | 48119430  | rs491025       | C | T | 1.15 (1.03, 1.27) | 0.009 | Imputed   | PTGIS        |
|    | 48121978  | rs5602         | A | G | 0.88 (0.80, 0.98) | 0.02  | Genotyped | PTGIS        |
|    | 48166050  | rs7274270      | A | T | 0.26 (0.07, 0.92) | 0.04  | Genotyped | PTGIS        |
|    | 48175598  | rs6125671      | A | G | 1.12 (1.00, 1.25) | 0.04  | Genotyped | PTGIS        |
|    | 48180058  | rs477627       | A | G | 1.14 (0.99, 1.3)  | 0.06  | Genotyped | PTGIS        |
| 22 | 44666676  | rs1807715      | G | A | 0.90 (0.81, 1.00) | 0.06  | Genotyped | KIAA1644     |
| 23 | 12865224  | rs3827469      | G | A | 1.09 (0.98, 1.21) | 0.10  | Genotyped | TLR7/TLR8    |

Analysis was adjusted for age and gender based on 2,322 discordant sibships. Sample size may vary due to sporadic missing genotypes. Allele frequencies are not shown because this is a sib-pair design and allele frequencies may not represent the general population.

<sup>a</sup>  $P < 0.1$  if a marker is genotyped ( $n=49$ ) and  $P < 0.05$  if imputed ( $n=31$ )

<sup>b</sup> Blank if the variant is not within a gene region.

Supplementary Table 4. 31 SNPs with P<0.05 from analysis in the Multi-ethnic Cohort

| SNP        | CHR | BP (HG19) | Gene         | Loc  | All Subjects |    | MAFs in Controls |     |     |     |     | OR (95% CI)      |                  |                  |                  |                  | In All Subjects  |                               |                |
|------------|-----|-----------|--------------|------|--------------|----|------------------|-----|-----|-----|-----|------------------|------------------|------------------|------------------|------------------|------------------|-------------------------------|----------------|
|            |     |           |              |      | Mi           | Ma | EA               | AA  | JA  | LA  | NH  | EA               | AA               | JA               | LA               | NH               | OR (95% CI)      | P <sub>het</sub> <sup>1</sup> | P <sup>2</sup> |
| rs541503   | 1   | 120208297 | PHGDH/ZNF697 | Intr | C            | T  | .37              | .19 | .05 | .32 | .12 | 1.06(0.86, 1.3)  | 1.21(0.98, 1.49) | 1.31(0.95, 1.79) | 1.15(0.94, 1.39) | 1.59(0.98, 2.59) | 1.15(1.03, 1.28) | .58                           | 0.01           |
| rs6768587  | 3   | 12338115  | PPARG        | Intr | G            | A  | .26              | .28 | .50 | .38 | .54 | 0.93(0.74, 1.17) | 0.97(0.8, 1.18)  | 0.85(0.73, 0.98) | 0.94(0.78, 1.14) | 0.84(0.6, 1.17)  | 0.9(0.83, 0.98)  | .91                           | 0.02           |
| rs17036188 | 3   | 12340925  | PPARG        | Intr | C            | T  | .03              | .04 | .29 | .02 | .28 | 1.17(0.64, 2.14) | 0.87(0.55, 1.38) | 0.83(0.71, 0.98) | 0.89(0.47, 1.68) | 0.84(0.57, 1.23) | 0.84(0.74, 0.96) | .79                           | 0.01           |
| rs12636461 | 3   | 12341830  | PPARG        | Intr | G            | A  | .26              | .27 | .49 | .38 | .54 | 0.93(0.74, 1.17) | 0.99(0.81, 1.2)  | 0.86(0.74, 0.99) | 0.94(0.78, 1.13) | 0.82(0.59, 1.15) | 0.91(0.83, 0.99) | .93                           | 0.03           |
| rs17036242 | 3   | 12349490  | PPARG        | Intr | A            | G  | .25              | .31 | .28 | .37 | .40 | 0.96(0.77, 1.21) | 0.98(0.81, 1.18) | 0.75(0.63, 0.89) | 0.96(0.79, 1.16) | 0.72(0.5, 1.04)  | 0.88(0.8, 0.96)  | .21                           | 0.005          |
| rs13061415 | 3   | 12349924  | PPARG        | Intr | C            | T  | .25              | .31 | .28 | .36 | .40 | 0.97(0.77, 1.22) | 1.00(0.83, 1.2)  | 0.75(0.64, 0.89) | 0.96(0.79, 1.16) | 0.7(0.49, 1.02)  | 0.88(0.81, 0.97) | .20                           | 0.007          |
| rs9310401  | 3   | 12352468  | PPARG        | Intr | C            | T  | .25              | .31 | .28 | .36 | .40 | 0.97(0.77, 1.22) | 0.86(0.71, 1.04) | 0.76(0.64, 0.9)  | 0.97(0.8, 1.18)  | 0.72(0.5, 1.03)  | 0.85(0.78, 0.94) | .20                           | 7.1E-04        |
| rs12487012 | 3   | 12356196  | PPARG        | Intr | C            | T  | .25              | .24 | .28 | .36 | .40 | 0.99(0.78, 1.24) | 0.85(0.69, 1.04) | 0.75(0.64, 0.89) | 0.97(0.8, 1.17)  | 0.72(0.5, 1.04)  | 0.86(0.78, 0.94) | .18                           | 0.001          |
| rs4684101  | 3   | 12361295  | PPARG        | Intr | C            | T  | .26              | .24 | .29 | .36 | .41 | 0.99(0.79, 1.25) | 0.86(0.7, 1.06)  | 0.75(0.63, 0.89) | 0.95(0.78, 1.16) | 0.72(0.5, 1.04)  | 0.86(0.78, 0.94) | .17                           | 0.001          |
| rs12493718 | 3   | 12363637  | PPARG        | Intr | T            | G  | .25              | .24 | .28 | .36 | .40 | 0.98(0.77, 1.23) | 0.85(0.69, 1.04) | 0.75(0.64, 0.89) | 0.97(0.8, 1.18)  | 0.73(0.5, 1.05)  | 0.85(0.78, 0.94) | .19                           | 9.1E-04        |
| rs79644791 | 3   | 12376427  | PPARG        | Intr | G            | A  | .02              | .01 | .25 | .02 | .22 | 1.2(0.64, 2.25)  | 0.92(0.46, 1.86) | 0.77(0.65, 0.92) | 0.76(0.37, 1.55) | 0.84(0.56, 1.26) | 0.81(0.7, 0.94)  | .64                           | 0.004          |
| rs12497191 | 3   | 12390135  | PPARG        | Intr | G            | A  | .13              | .08 | .26 | .26 | .26 | 1.08(0.81, 1.45) | 0.71(0.5, 1.01)  | 0.77(0.65, 0.92) | 0.87(0.7, 1.08)  | 0.75(0.5, 1.12)  | 0.83(0.74, 0.92) | .30                           | 6.3E-04        |
| rs4135304  | 3   | 12394601  | PPARG        | Intr | A            | G  | .00              | .35 | .00 | .03 | .00 | 0.59(0.1, 3.61)  | 1.34(1.14, 1.59) | NA               | 1.3(0.75, 2.25)  | 2.68(0.16, 45.2) | 1.33(1.14, 1.56) | 1                             | 2.9E-04        |
| rs6788489  | 3   | 12397838  | PPARG        | Intr | A            | T  | .00              | .10 | .00 | .00 | .00 | NA               | 1.43(1.1, 1.87)  | NA               | 1.98(0.6, 6.51)  | 2.65(0.16, 44.7) | 1.47(1.15, 1.88) | 1                             | 0.002          |
| rs6778740  | 3   | 12398636  | PPARG        | Intr | T            | C  | .00              | .31 | .00 | .03 | .00 | 0.31(0.03, 3.05) | 1.35(1.14, 1.61) | NA               | 1.26(0.72, 2.21) | 2.65(0.16, 44.7) | 1.35(1.15, 1.58) | 1                             | 2.5E-04        |
| rs9858822  | 3   | 12411238  | PPARG        | Intr | C            | A  | .00              | .31 | .00 | .03 | .00 | 0.31(0.03, 3.05) | 1.36(1.15, 1.62) | NA               | 1.26(0.72, 2.2)  | 2.65(0.16, 44.7) | 1.36(1.16, 1.6)  | .99                           | 1.5E-04        |
| rs9842021  | 3   | 12411727  | PPARG        | Intr | G            | T  | .00              | .10 | .00 | .01 | .00 | NA               | 0.74(0.55, 1)    | NA               | 1.1(0.42, 2.85)  | NA               | 0.74(0.56, 0.98) | .36                           | 0.04           |
| rs17036753 | 3   | 12479552  | TSEN2/PPARG  | Intr | T            | C  | .00              | .19 | .00 | .02 | .10 | 0.34(0.03, 3.31) | 1.36(1.11, 1.66) | NA               | 0.8(0.41, 1.56)  | 0.93(0.53, 1.64) | 1.24(1.04, 1.48) | .42                           | 0.02           |
| rs2115176  | 3   | 159716107 | IL12A        | Intr | C            | A  | .37              | .55 | .16 | .41 | .22 | 1.08(0.88, 1.32) | 1.08(0.91, 1.28) | 1.11(0.91, 1.34) | 1.2(1, 1.45)     | 1.12(0.75, 1.67) | 1.1(1.01, 1.21)  | .94                           | 0.03           |
| rs4679867  | 3   | 159723903 | IL12A        | Intr | A            | T  | .40              | .35 | .09 | .29 | .18 | 0.83(0.68, 1.03) | 0.8(0.66, 0.96)  | 0.91(0.7, 1.17)  | 0.95(0.77, 1.17) | 0.76(0.47, 1.22) | 0.85(0.77, 0.94) | .83                           | 0.002          |
| rs11746854 | 5   | 78829154  | PAPD4/HOMER1 | Intr | G            | A  | .18              | .27 | .24 | .17 | .21 | 1.25(0.97, 1.62) | 0.97(0.8, 1.17)  | 1.1(0.93, 1.3)   | 1.24(0.97, 1.59) | 1.55(1, 2.39)    | 1.12(1.02, 1.24) | .54                           | 0.02           |
| rs10942894 | 5   | 78831995  | HOMER1/PAPD4 | Intr | A            | G  | .15              | .36 | .19 | .40 | .18 | 0.96(0.73, 1.27) | 1.05(0.88, 1.26) | 0.98(0.81, 1.18) | 0.67(0.56, 0.82) | 0.8(0.49, 1.31)  | 0.9(0.82, 0.99)  | .07                           | 0.03           |
| rs41527045 | 5   | 78832082  | PAPD4/HOMER1 | Intr | A            | G  | .17              | .39 | .47 | .42 | .29 | 0.9(0.69, 1.17)  | 1(0.84, 1.19)    | 0.98(0.85, 1.13) | 0.7(0.57, 0.84)  | 0.66(0.44, 0.99) | 0.89(0.81, 0.97) | .05                           | 0.006          |
| rs7037117  | 9   | 120483663 | TLR4         | Intr | G            | A  | .25              | .67 | .20 | .23 | .36 | 1.05(0.84, 1.32) | 1.17(0.97, 1.4)  | 1.04(0.88, 1.25) | 1.12(0.9, 1.4)   | 1.23(0.85, 1.77) | 1.11(1.01, 1.22) | .92                           | 0.03           |
| rs4147584  | 9   | 132502899 | PTGES        | Intr | C            | G  | .08              | .03 | .23 | .12 | .25 | 0.9(0.62, 1.31)  | 1.3(0.84, 2.01)  | 0.84(0.71, 1.01) | 0.86(0.64, 1.15) | 0.56(0.36, 0.88) | 0.86(0.76, 0.98) | .70                           | 0.02           |
| rs12553596 | 9   | 132504668 | PTGES        | Intr | C            | T  | .09              | .03 | .23 | .12 | .26 | 0.85(0.59, 1.23) | 1.45(0.95, 2.22) | 0.87(0.73, 1.04) | 0.84(0.62, 1.14) | 0.55(0.35, 0.86) | 0.87(0.77, 0.99) | .65                           | 0.04           |
| rs3780906  | 10  | 45921982  | ALOX5        | Intr | A            | G  | .27              | .34 | .23 | .23 | .19 | 1.05(0.84, 1.32) | 1.14(0.96, 1.37) | 1.12(0.94, 1.33) | 1.11(0.9, 1.37)  | 0.79(0.5, 1.23)  | 1.1(1, 1.21)     | .77                           | 0.05           |
| rs702366   | 10  | 45934372  | ALOX5        | Intr | G            | A  | .47              | .51 | .42 | .38 | .34 | 1(0.81, 1.22)    | 1.12(0.95, 1.34) | 1.17(1.01, 1.35) | 1.01(0.83, 1.23) | 0.89(0.63, 1.25) | 1.09(1, 1.19)    | .50                           | 0.04           |
| rs353560   | 11  | 35156500  | CD44/PDHX    | Intr | G            | T  | .06              | .36 | .09 | .04 | .06 | 0.82(0.52, 1.31) | 1.14(0.95, 1.37) | 1.14(0.9, 1.46)  | 1.45(0.94, 2.25) | 1.37(0.68, 2.73) | 1.13(1, 1.28)    | .45                           | 0.05           |
| rs2553809  | 11  | 35163486  | CD44         | Intr | C            | T  | .30              | .16 | .23 | .20 | .16 | 1.24(1, 1.54)    | 1(0.79, 1.26)    | 1.23(1.04, 1.45) | 0.94(0.74, 1.19) | 1.04(0.66, 1.65) | 1.12(1.02, 1.24) | .40                           | 0.02           |
| rs11700258 | 20  | 48153744  | PTGIS        | Intr | G            | A  | .11              | .05 | .04 | .08 | .05 | 0.84(0.6, 1.18)  | 0.71(0.46, 1.11) | 0.89(0.63, 1.28) | 0.76(0.53, 1.1)  | 0.79(0.33, 1.88) | 0.81(0.68, 0.96) | .99                           | 0.02           |

Intr=Intron; Inter=intergenic; EA=European Americans; AA=African Americans; JA=Japanese Americans; LA=Latinos; NH=Native Hawaiians; Mi=Minor; Ma=Major; MAF=Minor Allele Frequency. All analyses were adjusting for age, gender and race. 2153 cases and 2630 controls were included in analysis. However, sample size may vary due to sporadic missing genotypes.

<sup>1</sup> P-value from tests of heterogeneity across racial groups

<sup>2</sup> P-value from single-marker analysis



**Supplementary Table 5. Association results for rs1801282 in *PPARG* (Pro12Ala)**

| SNP                  | CHR | BP (HG19) | Minor /Major          | Study <sup>§</sup> | Group | MAF <sup>¶</sup> (controls) | MAF <sup>¶</sup> (cases) | OR (95% CI)       | P                 |
|----------------------|-----|-----------|-----------------------|--------------------|-------|-----------------------------|--------------------------|-------------------|-------------------|
| rs1801282 (Pro12Ala) | 3   | 12393125  | G/C                   | CCFR               |       | 0.12                        | 0.12                     | 1.06 (0.91, 1.25) | 0.44              |
|                      |     |           |                       |                    | MEC*  |                             |                          |                   | 0.95 (0.80, 1.12) |
|                      |     |           |                       |                    | LA    | 0.09                        | 0.11                     | 1.19 (0.87, 1.64) | 0.27              |
|                      |     |           |                       |                    | JA    | 0.034                       | 0.025                    | 0.69 (0.44, 1.07) | 0.099             |
|                      |     |           |                       |                    | AA    | 0.050                       | 0.050                    | 0.93 (0.60, 1.43) | 0.73              |
|                      |     |           |                       |                    | EA    | 0.13                        | 0.12                     | 0.89 (0.65, 1.22) | 0.47              |
|                      |     |           |                       |                    | NH    | 0.14                        | 0.12                     | 0.84 (0.50, 1.41) | 0.51              |
|                      |     |           | Combined <sup>+</sup> |                    |       |                             | 1.01 (0.90, 1.13)        | 0.89              |                   |

CCFR: Colorectal Cancer Family Registry; MEC: Multiethnic Cohort; EA: European Americans; AA: African Americans; JA: Japanese Americans; LA: Latinos; NH: Native Hawaiians.

<sup>¶</sup> MAF: minor allele frequency. MAFs from cases and controls in CCFR were without adjustment for relatedness.

<sup>§</sup> Analysis in CCFR (2322 sibships) was adjusted for age and sex and that in the MEC (2153 cases, 2630 controls) was adjusted additionally for ethnic groups.

<sup>#</sup> P-values from tests of heterogeneity across ethnic groups in the MEC were > 0.3

+ I<sup>2</sup> for heterogeneity was zero.

\* rs1801282 was imputed in the MEC with R<sup>2</sup> = 1 in EA and NH, 0.96 in LA, 0.99 in JA, 0.80 in AA.

**Supplementary Table 6. SNPs (n=79) with published evidence of association with colorectal cancer that were included in CCFR analysis**

| SNP        | CHR | BP (HG18) | Gene (inside or nearby) |
|------------|-----|-----------|-------------------------|
| rs4659426  | 1   | 26516801  | CD52                    |
| rs1326390  | 1   | 101031613 |                         |
| rs4648268  | 1   | 184913761 | PTGS2                   |
| rs10735510 | 1   | 210852083 | ATF3                    |
| rs12070345 | 1   | 210856958 | ATF3                    |
| rs1966813  | 2   | 45951401  | PRKCE                   |
| rs11903923 | 2   | 46112445  | PRKCE                   |
| rs12474258 | 2   | 102183127 | IL1RL2                  |
| rs11692230 | 2   | 102221497 | IL1RL2                  |
| rs4988235  | 2   | 136325116 | MCM6                    |
| rs2066804  | 2   | 191550004 | STAT1                   |
| rs13029247 | 2   | 191574903 | STAT1                   |
| rs13389408 | 2   | 191641528 | STAT4                   |
| rs2975758  | 2   | 241179423 | CAPN10                  |
| rs6764111  | 3   | 53182441  | PRKCD                   |
| rs6778964  | 3   | 53183822  | PRKCD                   |
| rs720688   | 3   | 101363259 | CMSS1                   |
| rs2053211  | 3   | 145257282 |                         |
| rs231983   | 3   | 173719134 | TNFSF10                 |
| rs17453783 | 4   | 87827881  | PTPN13                  |
| rs3775977  | 4   | 175666383 | PGDH                    |
| rs1863642  | 4   | 175670488 | PGDH                    |
| rs12500316 | 4   | 175676599 | PGDH                    |
| rs1877730  | 4   | 187842470 | FAT                     |
| rs7722221  | 5   | 7783872   | ADCY2                   |
| rs30168    | 5   | 13772089  | DNAH5                   |
| rs1862610  | 5   | 52163637  | ITGA1                   |
| rs736201   | 5   | 78873312  |                         |
| rs31517    | 5   | 135314928 | LECT2                   |
| rs1368375  | 5   | 139582578 | CYSTM1                  |
| rs2569193  | 5   | 139995679 | CD14                    |
| rs25856    | 5   | 156556482 | ITK                     |
| rs4361609  | 6   | 31348614  |                         |
| rs2524082  | 6   | 31349740  |                         |
| rs723725   | 7   | 17652870  |                         |
| rs3752651  | 7   | 55197037  | EGFR                    |
| rs2740764  | 7   | 55234952  | EGFR                    |
| rs1104666  | 8   | 56391240  | XKR4                    |
| rs7820484  | 8   | 56968031  | LYN                     |
| rs884115   | 9   | 129927677 | PTGES2                  |
| rs2801499  | 10  | 12436016  | CAMK1D                  |
| rs2768367  | 10  | 12537776  | CAMK1D                  |
| rs8177029  | 10  | 30788504  | MAP3K8                  |
| rs2776937  | 10  | 33646195  | NRP1                    |
| rs768395   | 10  | 79879516  |                         |
| rs7895217  | 10  | 88578719  | BMPR1A                  |
| rs2883420  | 10  | 88601102  | BMPR1A                  |
| rs10749542 | 10  | 88621608  | BMPR1A                  |
| rs353560   | 11  | 35113076  | CD44                    |
| rs567075   | 11  | 85507805  |                         |
| rs2286600  | 12  | 6353047   | SCNN1A                  |
| rs16907705 | 12  | 12128996  | BCL2L14                 |
| rs697212   | 12  | 102624747 | STAB2                   |
| rs3809240  | 12  | 105519399 | LOC100287944            |
| rs5637     | 12  | 119247148 | PLA2G1B                 |
| rs17222919 | 13  | 30206329  | ALOX5AP                 |
| rs9315048  | 13  | 30225840  | ALOX5AP                 |
| rs8046826  | 16  | 46730882  | ABCC12                  |
| rs173537   | 16  | 55538409  | HERPUD1                 |
| rs3785275  | 16  | 88369530  |                         |
| rs2227321  | 17  | 35424820  | MED24, CSF3             |
| rs1481280  | 18  | 16909449  | ROCK1                   |
| rs891282   | 18  | 19793058  | LAMA3                   |
| rs953786   | 18  | 19859785  | TTC39C                  |
| rs9963281  | 18  | 54550898  | MALT1                   |
| rs874299   | 18  | 73185272  |                         |
| rs8108253  | 19  | 4607466   | C19orf10                |
| rs8112182  | 19  | 4619417   | C19orf10                |
| rs2312586  | 19  | 40525246  | CD22                    |
| rs3928916  | 19  | 46899465  | CEACAM5                 |
| rs10211789 | 20  | 8485044   | PLCB1                   |
| rs6055995  | 20  | 8610222   | PLCB1                   |
| rs926668   | 20  | 49594865  | NFATC2                  |
| rs2426512  | 20  | 52493666  |                         |
| rs17241025 | 21  | 15254794  | NRIP1                   |
| rs2298560  | 21  | 39107845  | EST2                    |
| rs760456   | 21  | 45153843  | ITGB2                   |
| rs8141011  | 22  | 30671790  | YWHAH                   |
| rs1807715  | 22  | 42998009  | KIAA1644                |

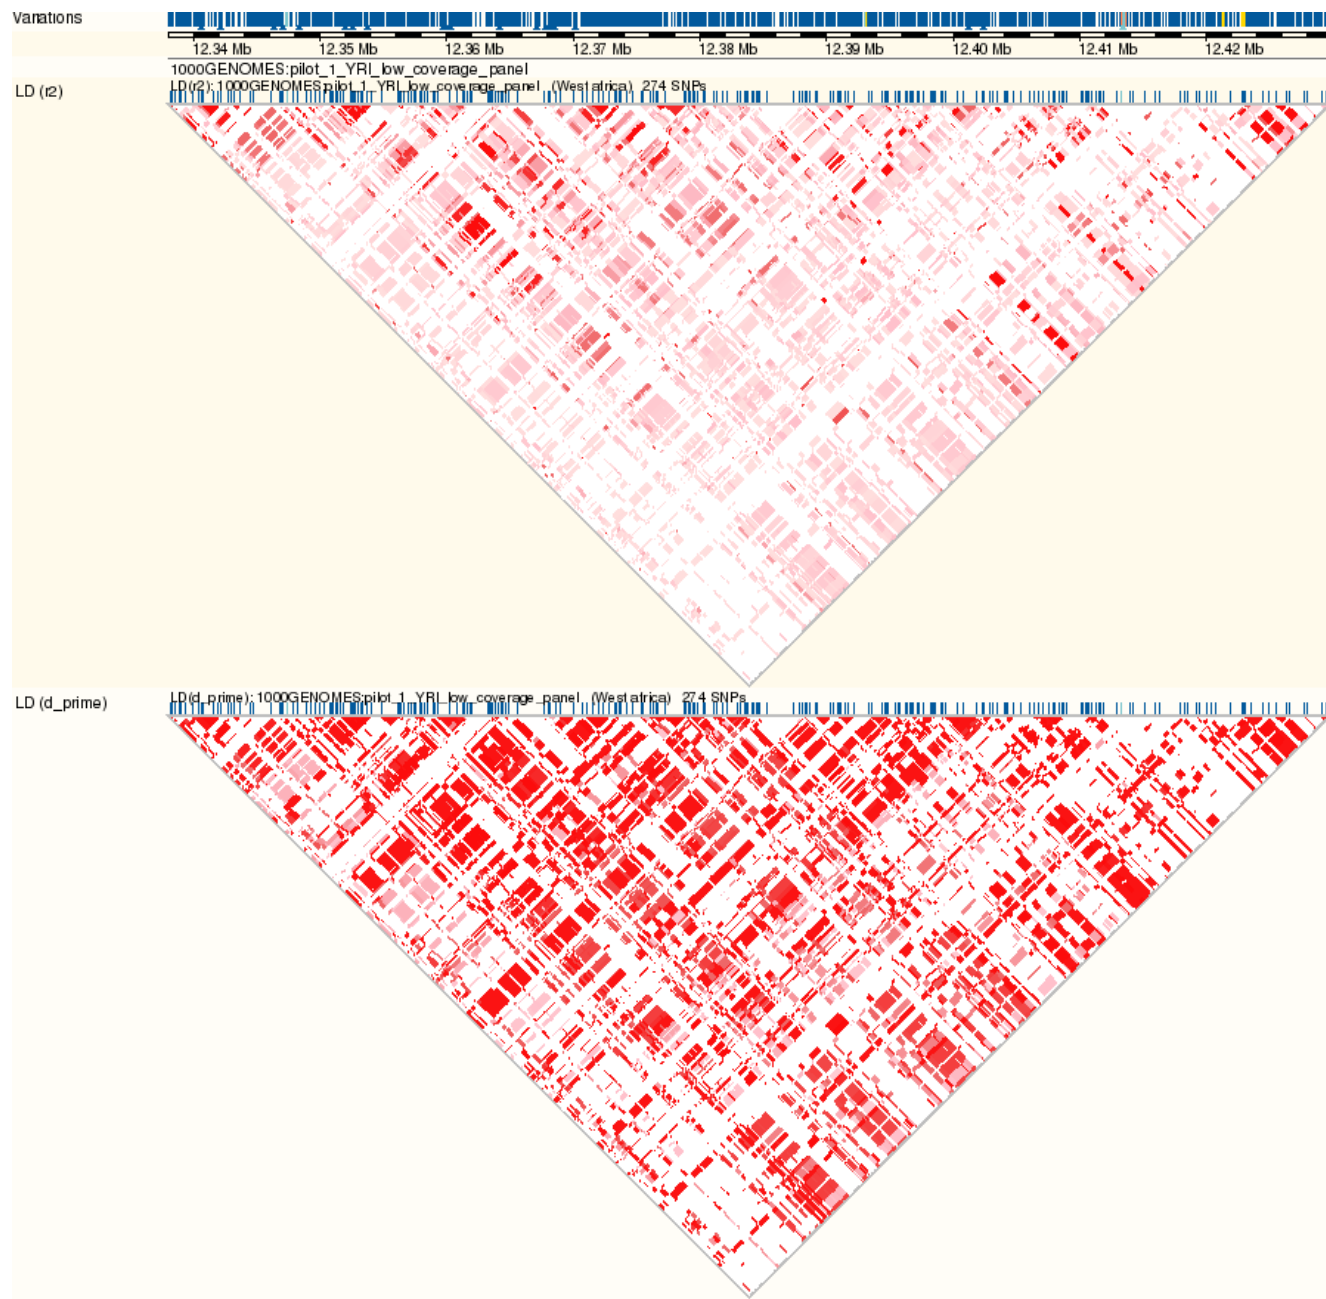

Supplementary Figure 1. LD structure (upper panel:  $r^2$ , lower panel:  $|D'|$ ) of *PPARG* for YRI in the 1000 Genomes project

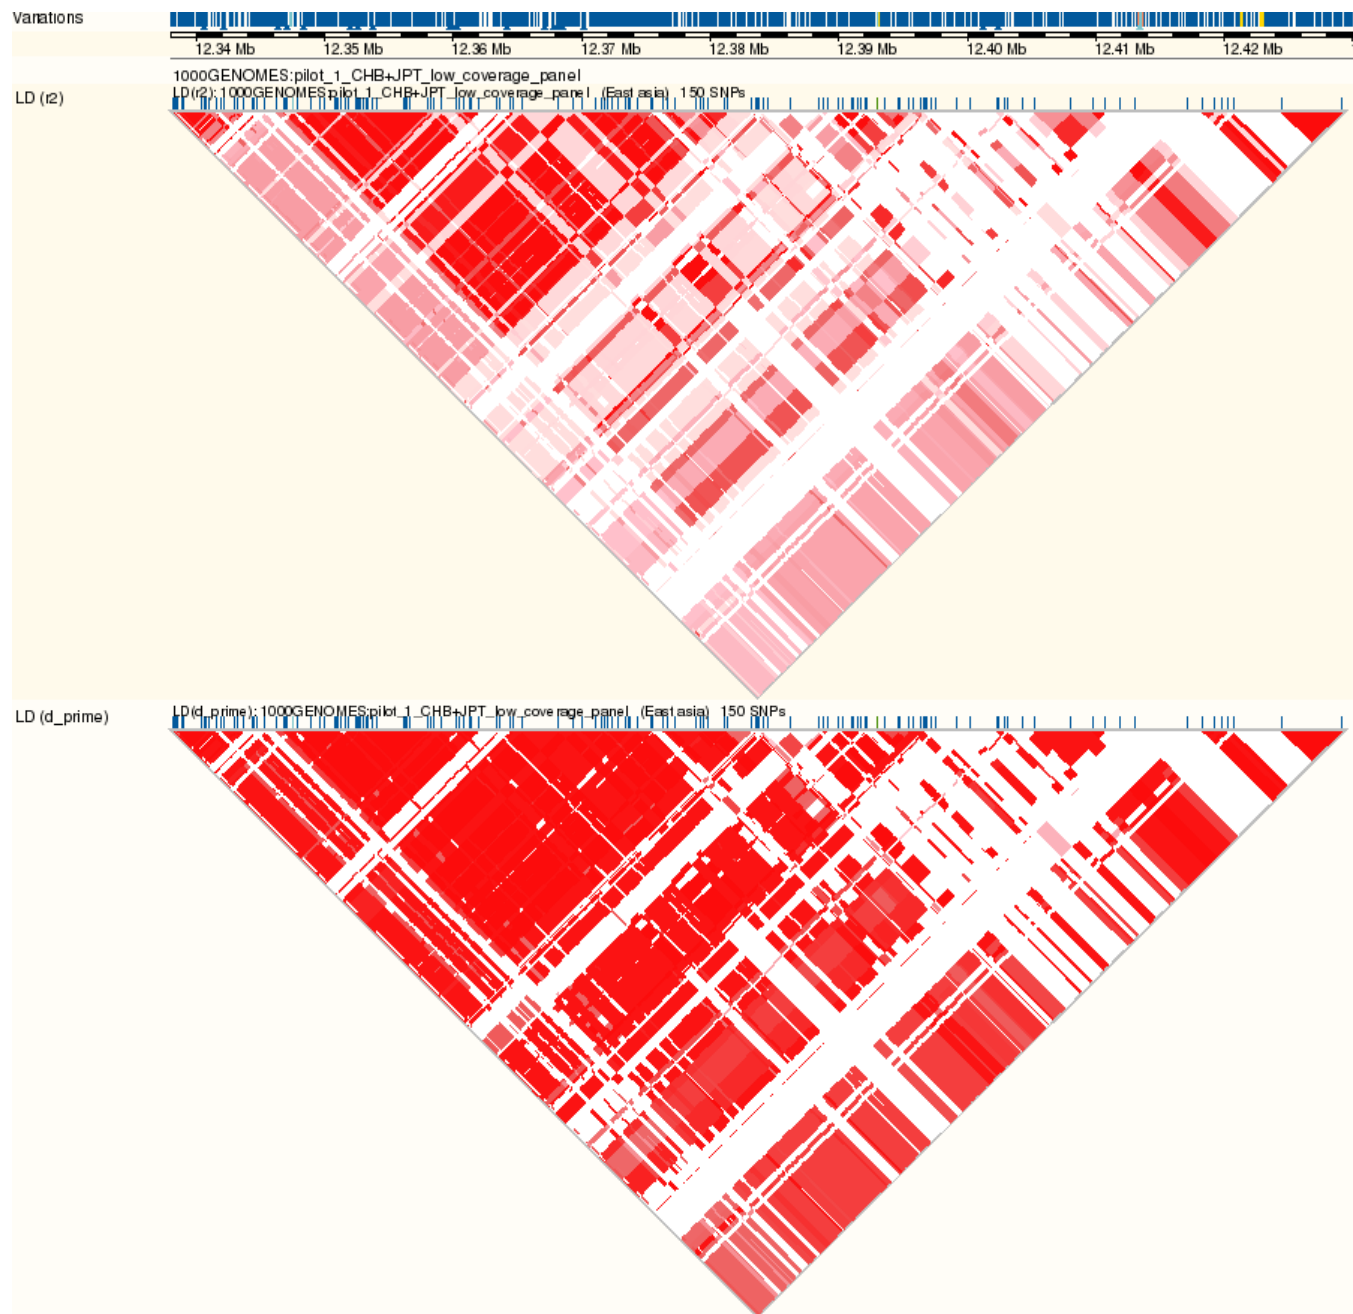

Supplementary Figure 2. LD structure (upper panel:  $r^2$ , lower panel:  $|D'|$ ) of *PPARG* for ASN in the 1000 Genomes project

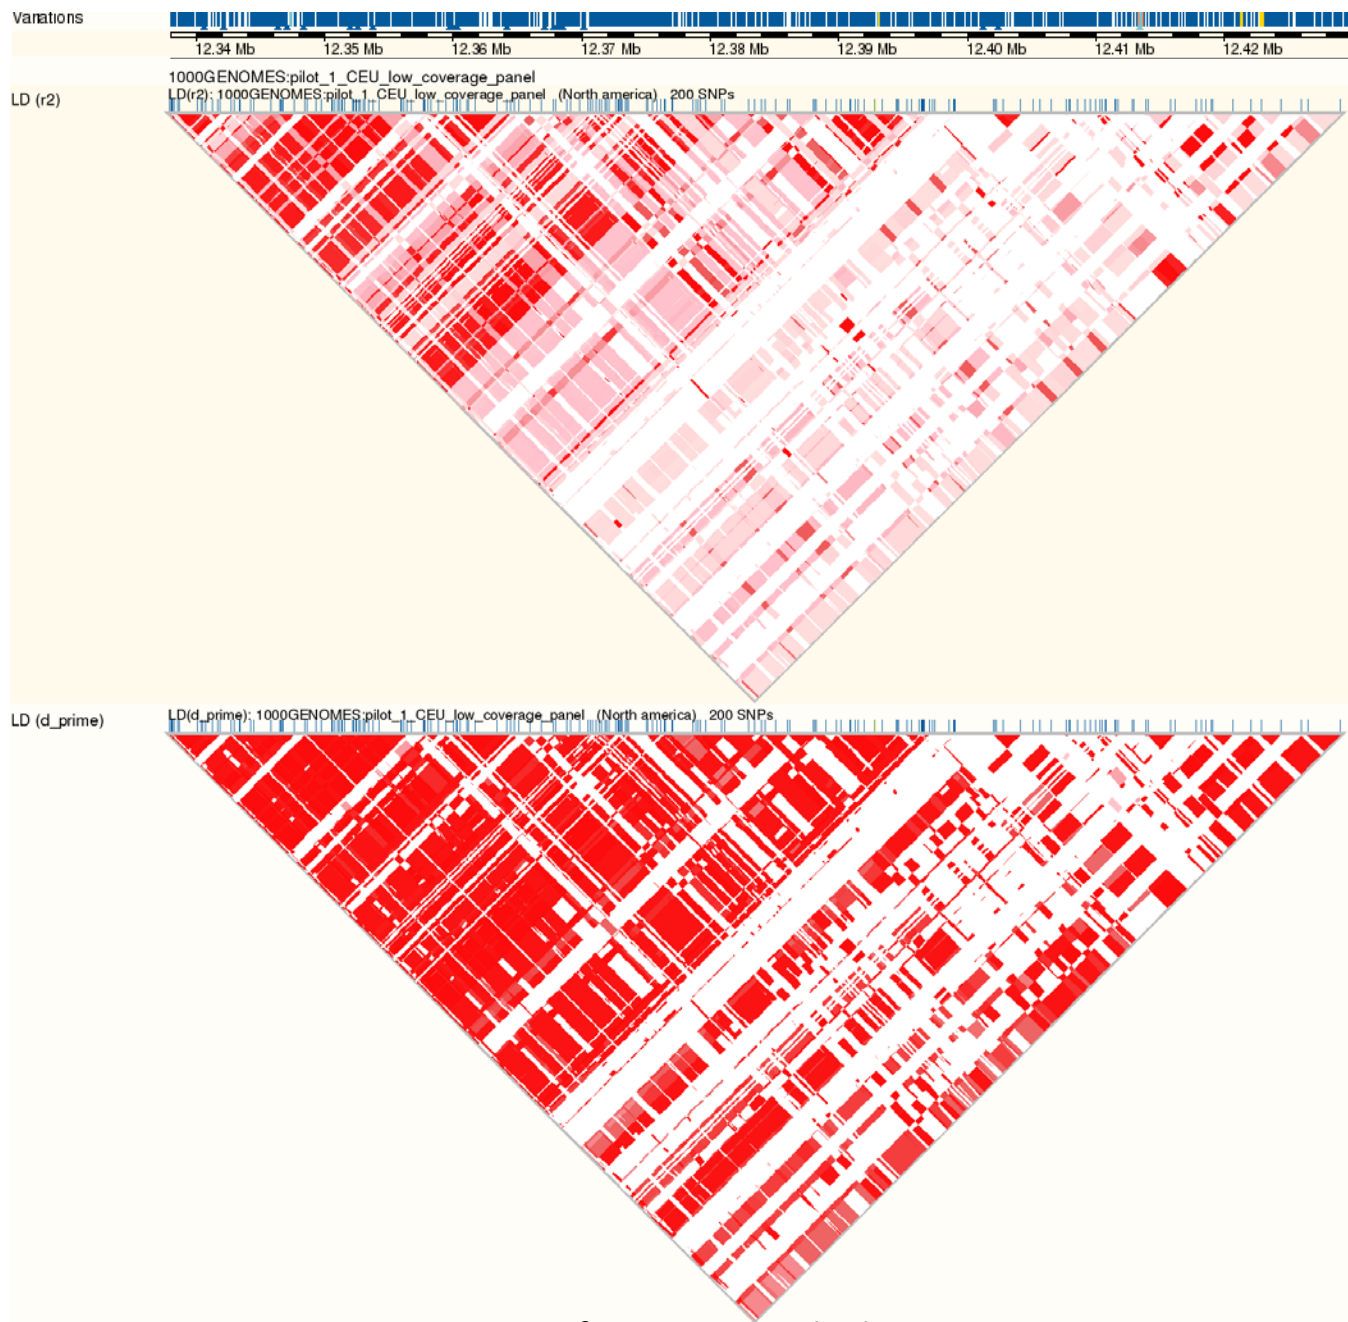

Supplementary Figure 3. LD structure (upper panel: $r^2$ , lower panel:  $|D'|$ ) of *PPARG* for EUR in the 1000 Genomes project
